# Supplementary material
Source: PubMed Central journal article supplement (PMC3186826)
Supplement: NIHMS318516-supplement-1.pdf [file NIHMS318516-supplement-1.pdf]

**A. Syk Expression in Peripheral Blood Leukocytes**

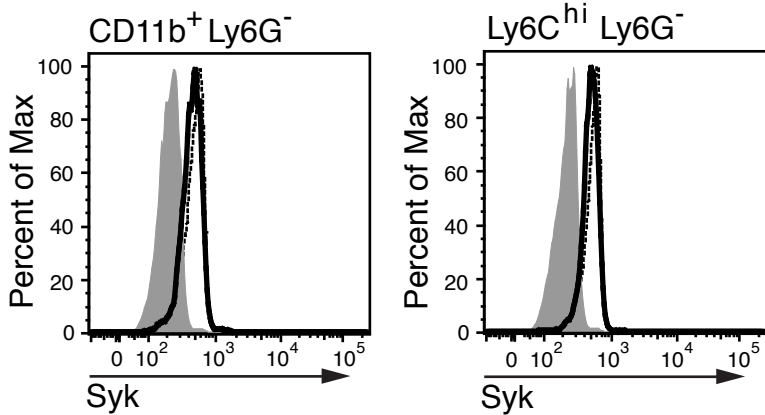

**B. MRP8-cre-GFP Expression in Leukocytes**

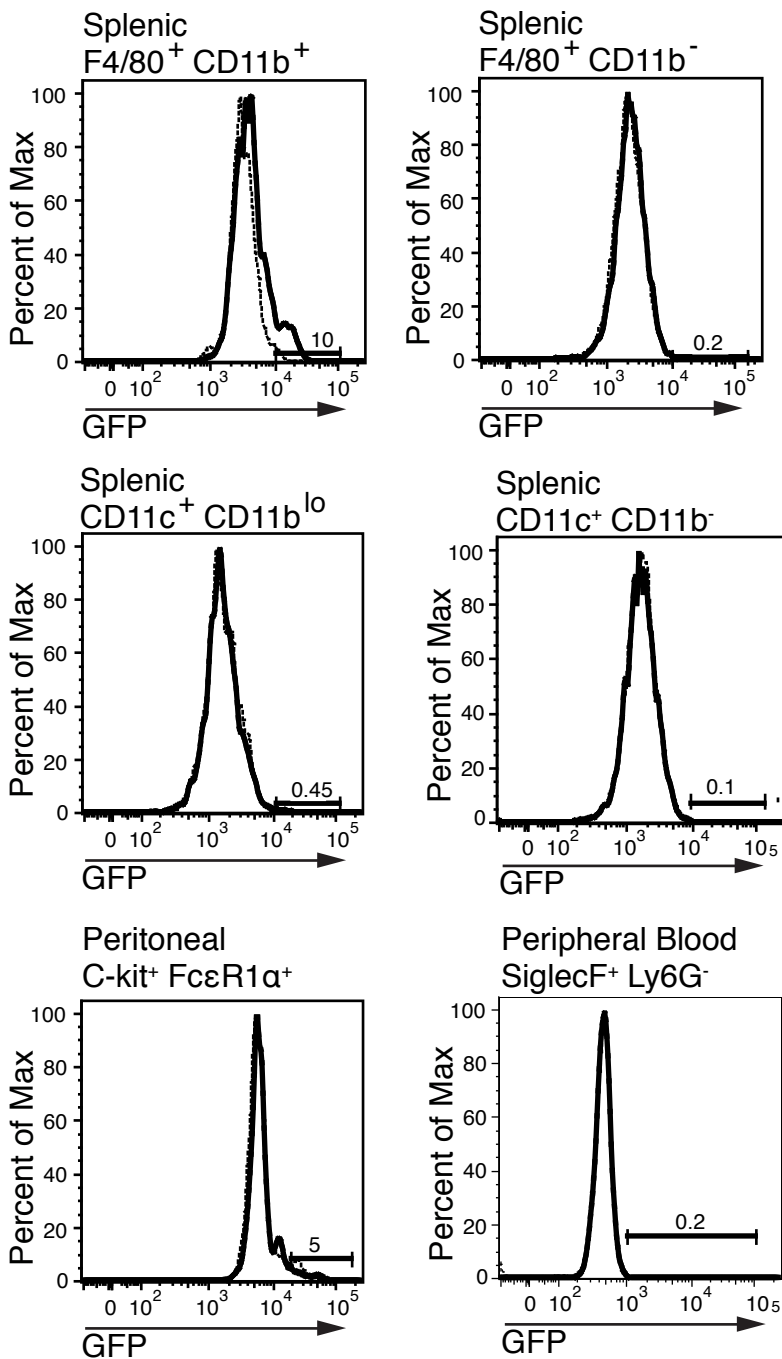

----- C57BL/6  
 ■ *syk*<sup>-/-</sup>  
 — *syk*<sup>ff</sup> *MRP8-cre*<sup>+</sup>

**C. MRP8-cre-GFP Expression in Leukocytes**

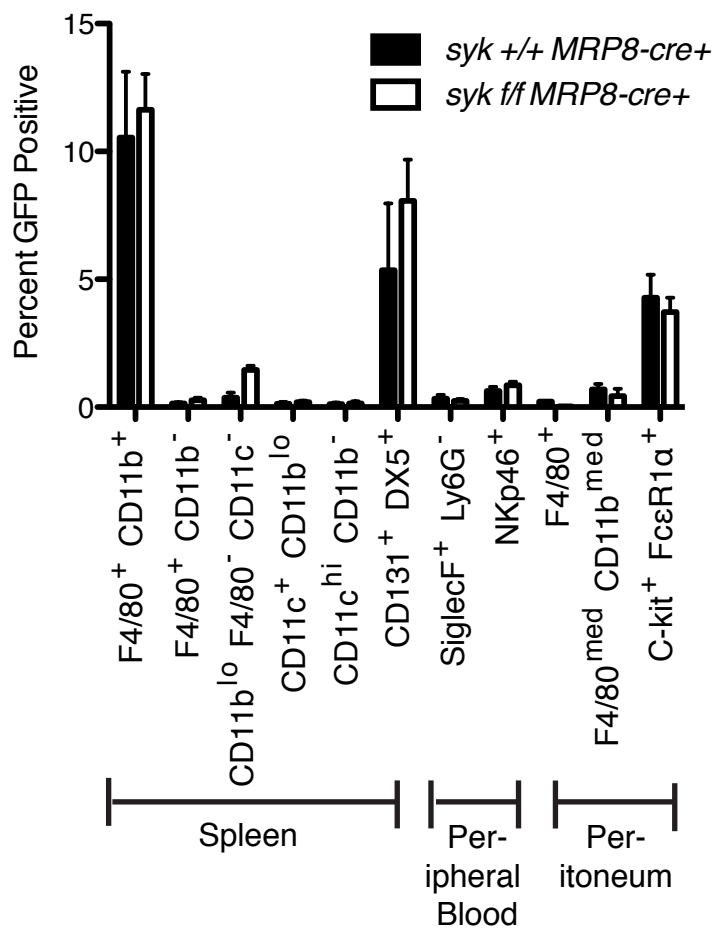

**Supplemental Figure 1.** MRP8-cre-GFP expression is limited mainly to neutrophils. **A**, Representative histograms of Syk expression of peripheral blood monocyte populations ( $CD11b^+ Ly6G^-$  and  $Ly6C^{hi} Ly6G^-$ ) from C57BL/6 (black dashed line), *syk*<sup>-/-</sup> (solid gray), and *syk*<sup>ff</sup> *MRP8-cre*<sup>+</sup> (solid black line) mice. **B**, Representative histograms of GFP expression in splenic macrophages ( $F4/80^+$ ) and dendritic cells ( $CD11c^+$ ), peritoneal mast cells ( $C-kit^+ Fc\epsilon R1\alpha^+$ ) and peripheral blood eosinophils ( $SiglecF^+ Ly6G^-$ ) from C57BL/6 (black dashed line) and *syk*<sup>ff</sup> *MRP8-cre*<sup>+</sup> (black line) mice. Percent GFP positive in the *syk*<sup>ff</sup> *MRP8-cre*<sup>+</sup> mice are shown. **C**, GFP expression in various leukocytes as defined above, as well as  $CD11b^{lo} F4/80^- CD11c^-$  monocytes/macrophages, basophils ( $CD131^+ DX5^+$ ), and natural killer (NK) cells ( $NKp46^+$ ). Data from *syk*<sup>+/+</sup> *MRP8-cre*<sup>+</sup> (black bars, n=3) and *syk*<sup>ff</sup> *MRP8-cre*<sup>+</sup> (white bars, n=6-12) mice. Error bars represent SEM.

**A.** Arthritis in *syk<sup>fl/fl</sup> MRP8-cre<sup>+</sup>* Mice

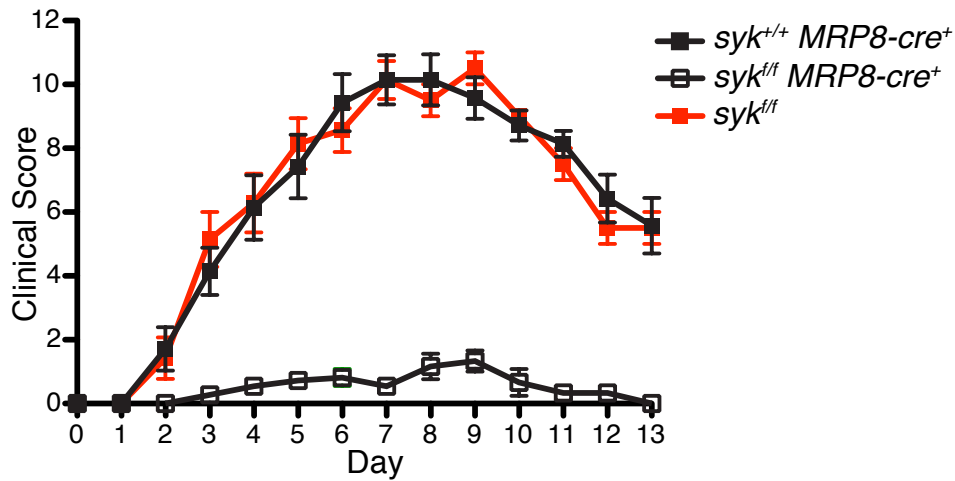

**B.** Arthritis in Chimeric Mice

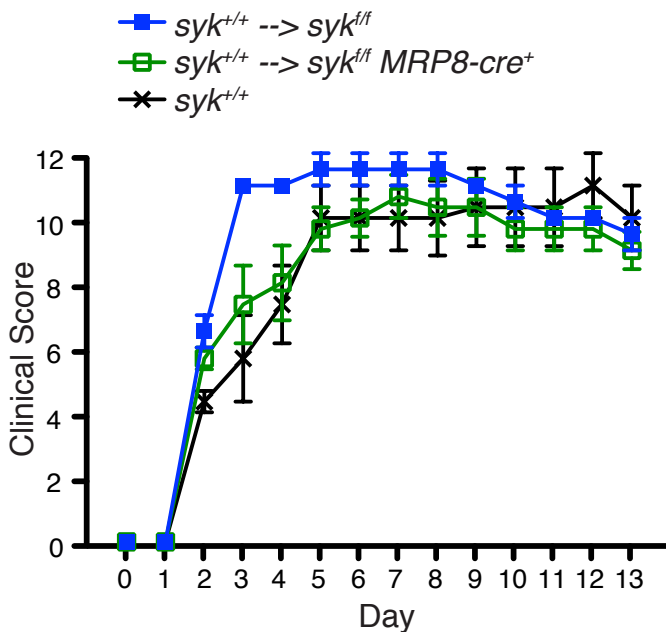

**C.** Serum Anti-IgG Titers

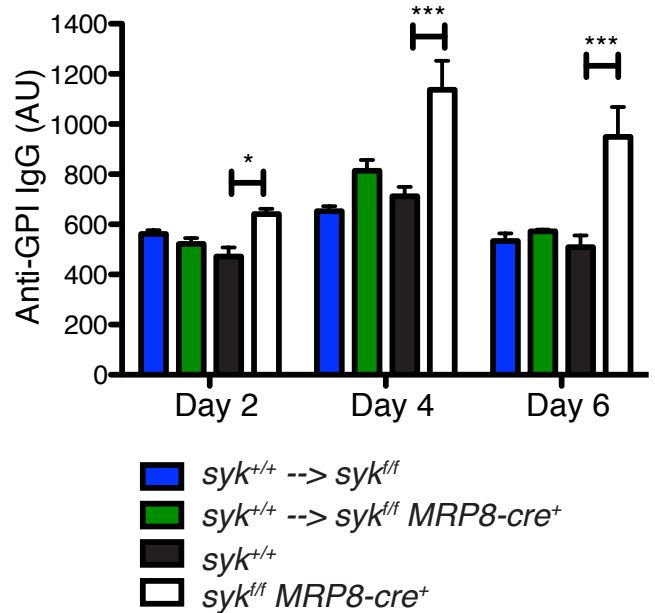

**Supplemental Figure 2.** Conditional deletion of Syk in neutrophils protects mice from K/BxN serum-induced arthritis. **A**, Clinical score was recorded at the indicated times following K/BxN serum transfer in *syk<sup>fl/fl</sup>*, *syk<sup>+/+</sup> MRP8-cre<sup>+</sup>*, and *syk<sup>fl/fl</sup> MRP8-cre<sup>+</sup>* mice (n=4). Use of these genotypes controls for potential effects of the *syk<sup>fl/fl</sup>* mutation – showing that *Syk<sup>fl/fl</sup>* mice respond normally to K/BxN serum. Representative plots from 2 independent experiments. **B**, **C**, *syk<sup>fl/fl</sup> MRP8-cre<sup>+</sup>* recipients were lethally irradiated and reconstituted with congenically marked (CD45.1) wild type bone marrow to control for the contribution of radioresistant cells to the phenotype of *syk<sup>fl/fl</sup> MRP8-cre<sup>+</sup>* mice. **B**, Clinical score and **C**, anti-GPI IgG serum titers were recorded at the indicated times following K/BxN serum transfer in *syk<sup>+/+</sup> --> syk<sup>fl/fl</sup>* (n=2) and *syk<sup>+/+</sup> --> syk<sup>fl/fl</sup> MRP8-cre<sup>+</sup>* (n=3) chimeric mice, and non-irradiated *syk<sup>+/+</sup>* and *syk<sup>fl/fl</sup> MRP8-cre<sup>+</sup>* mice (n=3). Error bars represent  $\pm$ SEM. \* = p < 0.05, \*\*\* = p < .001, analyzed by two-way ANOVA.

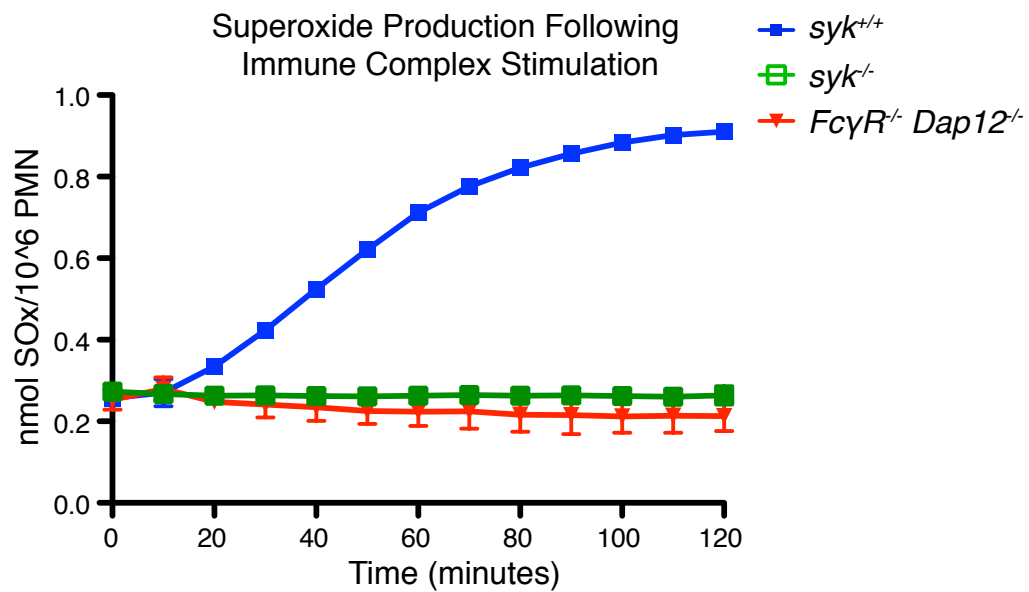

**Supplemental Figure 3.** Syk-deficient neutrophils show impaired superoxide production in response to immune complex stimulation *in vitro*. Bone marrow-derived neutrophils from the indicated mice were plated with immune complexes and superoxide (SOx) production was monitored as described (VanZiffle and Lowell, Blood, 144:4871 (2009)). FcγR<sup>-/-</sup> Dap12<sup>-/-</sup> cells, lacking all activating FcγRs, served as negative controls.
